# Supplementary material for: American Cranberry (Oxycoccus macrocarpus (Ait.) Pursh) Leaves Extract and Its Amino-Acids Preparation: The Phytochemical and Pharmacological Study
Source: MDPI journal article supplement (doi:10.3390/plants12102010), 2023-05-17
Supplement: s1 [file s1]

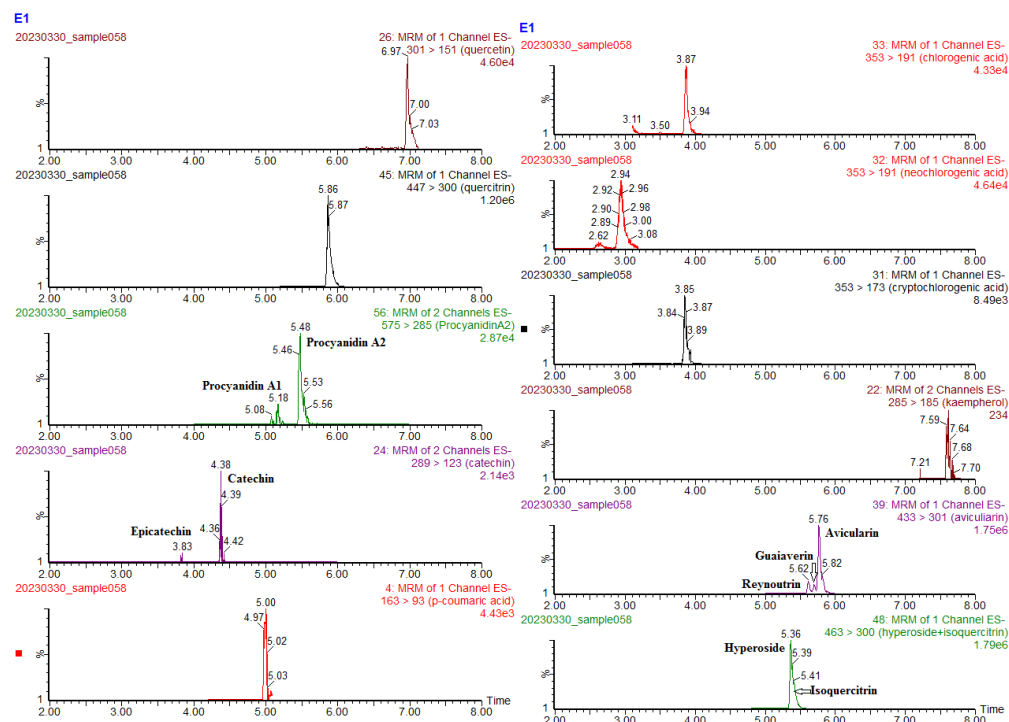

Figure S1. Typical UPLC-MS/MS chromatograms of phenolic components in the samples.

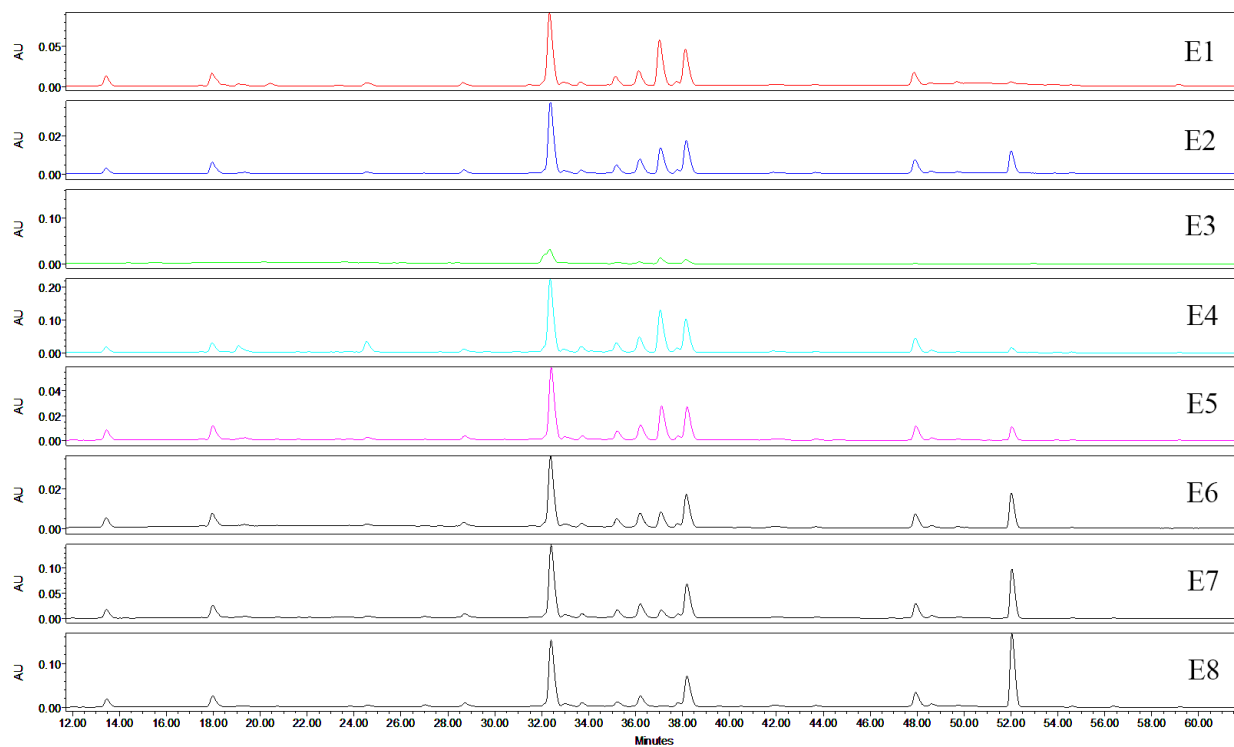

Figure S2. Comparative HPLC-PDA profiles at 325 nm of different extracts.
